# Supplementary material for: Regeneration of tree species after 11 years of canopy gap creation and deer exclusion in a warm temperate broad-leaved forest over-browsed by sika deer
Source: PeerJ. 2022 Nov 1;10:e14210. doi: 10.7717/peerj.14210 (PMC9635360; doi:10.7717/peerj.14210)
Supplement: Supplemental Information 6 [file peerj-10-14210-s006.csv]

subplot	location	plot	Treatment	quadratsize	heightclass	Quercusacuta	Abiesfirma	Euryajaponica	Castanopsissieboldii	Cinnamomumtenuifolium	Cameliajaponica	Quercusglauca	Neolitseasericea
AB1	KBS	1	Ctrl	5mx 1m	30cm ≤ x < 1m	0	0	2	0	0	0	0	0
AB4	KBS	1	Ctrl	5mx 1m	30cm ≤ x < 1m	0	0	0	0	0	0	0	0
AB2	KBS	1	E	5mx 1m	30cm ≤ x < 1m	0	0	0	4	1	0	0	0
AB3	KBS	1	E	5mx 1m	30cm ≤ x < 1m	0	0	0	0	0	0	0	0
AA3	KBS	2	G	5mx 1m	30cm ≤ x < 1m	0	0	2	0	0	0	0	0
AA4	KBS	2	G	5mx 1m	30cm ≤ x < 1m	0	0	0	0	0	0	0	0
AA2	KBS	2	EG	5mx 1m	30cm ≤ x < 1m	0	0	8	0	0	0	0	0
AA1	KBS	2	EG	5mx 1m	30cm ≤ x < 1m	0	0	4	0	0	0	1	0
BB1	HNK	3	Ctrl	5mx 1m	30cm ≤ x < 1m	0	0	3	0	0	0	0	0
BB4	HNK	3	Ctrl	5mx 1m	30cm ≤ x < 1m	0	0	0	0	0	0	0	0
BB3	HNK	3	E	5mx 1m	30cm ≤ x < 1m	3	0	0	0	0	0	0	1
BB2	HNK	3	E	5mx 1m	30cm ≤ x < 1m	6	0	0	0	0	0	0	0
BA1	HNK	4	G	5mx 1m	30cm ≤ x < 1m	0	3	2	0	0	0	0	0
BA4	HNK	4	G	5mx 1m	30cm ≤ x < 1m	0	2	3	0	0	0	0	0
BA3	HNK	4	EG	5mx 1m	30cm ≤ x < 1m	0	0	29	1	0	1	0	0
BA2	HNK	4	EG	5mx 1m	30cm ≤ x < 1m	5	5	22	0	0	0	0	0
CB3	HRT	5	Ctrl	5mx 1m	30cm ≤ x < 1m	0	0	0	0	0	0	0	0
CB2	HRT	5	Ctrl	5mx 1m	30cm ≤ x < 1m	0	0	0	0	0	0	0	0
CB1	HRT	5	E	5mx 1m	30cm ≤ x < 1m	0	0	0	0	0	0	0	0
CB4	HRT	5	E	5mx 1m	30cm ≤ x < 1m	0	0	0	2	0	0	0	0
CA2	HRT	6	G	5mx 1m	30cm ≤ x < 1m	0	0	1	0	0	0	0	0
CA3	HRT	6	G	5mx 1m	30cm ≤ x < 1m	0	1	0	0	0	0	0	0
CA1	HRT	6	EG	5mx 1m	30cm ≤ x < 1m	1	0	18	0	0	4	0	0
CA4	HRT	6	EG	5mx 1m	30cm ≤ x < 1m	3	0	9	0	0	0	0	0
AB1	KBS	1	Ctrl	5mx5m	1m ≤ x < 2m	0	0	0	0	0	0	0	0
AB4	KBS	1	Ctrl	5mx5m	1m ≤ x < 2m	0	0	0	0	0	0	0	1
AB2	KBS	1	E	5mx5m	1m ≤ x < 2m	1	0	1	7	0	0	0	1
AB3	KBS	1	E	5mx5m	1m ≤ x < 2m	0	0	4	5	1	0	0	0
AA3	KBS	2	G	5mx5m	1m ≤ x < 2m	0	0	0	0	0	0	0	6
AA4	KBS	2	G	5mx5m	1m ≤ x < 2m	0	0	0	0	0	0	0	0
AA2	KBS	2	EG	5mx5m	1m ≤ x < 2m	0	0	11	0	0	0	1	0
AA1	KBS	2	EG	5mx5m	1m ≤ x < 2m	0	0	2	0	0	0	0	0
BB1	HNK	3	Ctrl	5mx5m	1m ≤ x < 2m	0	0	0	0	0	0	0	0
BB4	HNK	3	Ctrl	5mx5m	1m ≤ x < 2m	0	0	0	0	0	0	0	0
BB3	HNK	3	E	5mx5m	1m ≤ x < 2m	0	0	0	0	0	0	0	0
BB2	HNK	3	E	5mx5m	1m ≤ x < 2m	3	0	0	0	4	1	0	0
BA1	HNK	4	G	5mx5m	1m ≤ x < 2m	0	0	0	0	0	0	0	1
BA4	HNK	4	G	5mx5m	1m ≤ x < 2m	0	0	0	0	0	0	0	2
BA3	HNK	4	EG	5mx5m	1m ≤ x < 2m	0	0	54	0	0	7	0	1
BA2	HNK	4	EG	5mx5m	1m ≤ x < 2m	6	1	60	2	0	0	0	1
CB3	HRT	5	Ctrl	5mx5m	1m ≤ x < 2m	0	0	0	0	0	0	0	0
CB2	HRT	5	Ctrl	5mx5m	1m ≤ x < 2m	0	0	0	0	0	0	0	0
CB1	HRT	5	E	5mx5m	1m ≤ x < 2m	0	0	0	0	0	0	0	0
CB4	HRT	5	E	5mx5m	1m ≤ x < 2m	0	0	0	0	0	0	0	0
CA2	HRT	6	G	5mx5m	1m ≤ x < 2m	0	2	0	0	0	0	0	0
CA3	HRT	6	G	5mx5m	1m ≤ x < 2m	0	1	0	0	0	0	0	1
CA1	HRT	6	EG	5mx5m	1m ≤ x < 2m	2	0	24	0	3	1	0	0
CA4	HRT	6	EG	5mx5m	1m ≤ x < 2m	6	0	21	0	3	0	0	0
AB1	KBS	1	Ctrl	5mx 1m	10cm ≤ x < 30cm	0	0	1	0	0	0	0	0
AB4	KBS	1	Ctrl	5mx 1m	10cm ≤ x < 30cm	0	0	0	0	0	0	0	0
AB2	KBS	1	E	5mx 1m	10cm ≤ x < 30cm	0	0	0	1	0	0	0	0
AB3	KBS	1	E	5mx 1m	10cm ≤ x < 30cm	0	0	0	0	0	0	0	1
AA3	KBS	2	G	5mx 1m	10cm ≤ x < 30cm	0	1	6	0	0	0	0	0
AA4	KBS	2	G	5mx 1m	10cm ≤ x < 30cm	0	0	0	0	0	0	0	0
AA2	KBS	2	EG	5mx 1m	10cm ≤ x < 30cm	0	0	1	0	0	0	0	0
AA1	KBS	2	EG	5mx 1m	10cm ≤ x < 30cm	0	0	0	0	0	0	0	0
BB1	HNK	3	Ctrl	5mx 1m	10cm ≤ x < 30cm	0	0	8	0	0	0	0	0
BB4	HNK	3	Ctrl	5mx 1m	10cm ≤ x < 30cm	0	0	0	0	0	0	0	0
BB3	HNK	3	E	5mx 1m	10cm ≤ x < 30cm	1	0	0	0	1	0	0	2
BB2	HNK	3	E	5mx 1m	10cm ≤ x < 30cm	0	0	0	0	0	0	0	0
BA1	HNK	4	G	5mx 1m	10cm ≤ x < 30cm	0	1	10	0	0	0	0	0
BA4	HNK	4	G	5mx 1m	10cm ≤ x < 30cm	0	11	20	0	0	0	0	0
BA3	HNK	4	EG	5mx 1m	10cm ≤ x < 30cm	0	4	8	0	0	0	0	0
BA2	HNK	4	EG	5mx 1m	10cm ≤ x < 30cm	0	0	0	0	0	0	0	0
CB2	HRT	5	Ctrl	5mx 1m	10cm ≤ x < 30cm	0	0	1	0	0	0	0	0
CB3	HRT	5	Ctrl	5mx 1m	10cm ≤ x < 30cm	0	0	3	0	0	0	0	0
CB1	HRT	5	E	5mx 1m	10cm ≤ x < 30cm	0	0	0	0	0	0	0	0
CB4	HRT	5	E	5mx 1m	10cm ≤ x < 30cm	0	0	0	1	1	0	0	0
CA2	HRT	6	G	5mx 1m	10cm ≤ x < 30cm	0	0	10	0	0	0	0	0
CA3	HRT	6	G	5mx 1m	10cm ≤ x < 30cm	0	0	0	0	0	0	0	0
CA1	HRT	6	EG	5mx 1m	10cm ≤ x < 30cm	0	1	10	0	0	4	0	0
CA4	HRT	6	EG	5mx 1m	10cm ≤ x < 30cm	2	0	3	0	0	1	0	0
AB1	KBS	1	Ctrl	10mx10m	>2m	0	0	0	0	0	0	0	0
AB4	KBS	1	Ctrl	10mx10m	>2m	0	0	0	0	0	0	0	0
AB2	KBS	1	E	10mx10m	>2m	0	0	0	0	0	0	0	0
AB3	KBS	1	E	10mx10m	>2m	0	0	0	0	0	0	0	0
AA3	KBS	2	G	10mx10m	>2m	0	0	0	0	0	0	0	44
AA4	KBS	2	G	10mx10m	>2m	0	0	0	0	0	0	1	16
AA2	KBS	2	EG	10mx10m	>2m	0	0	8	26	3	0	41	3
AA1	KBS	2	EG	10mx10m	>2m	5	0	27	13	1	0	44	9
BB1	HNK	3	Ctrl	10mx10m	>2m	0	0	0	0	0	0	0	0
BB4	HNK	3	Ctrl	10mx10m	>2m	0	0	0	0	0	0	0	0
BB3	HNK	3	E	10mx10m	>2m	0	0	0	0	0	0	0	0
BB2	HNK	3	E	10mx10m	>2m	0	0	0	0	0	0	0	0
BA1	HNK	4	G	10mx10m	>2m	0	0	0	0	1	0	0	5
BA4	HNK	4	G	10mx10m	>2m	0	0	0	0	0	0	0	0
BA3	HNK	4	EG	10mx10m	>2m	74	0	54	20	8	30	0	0
BA2	HNK	4	EG	10mx10m	>2m	81	0	90	23	8	10	0	0
CB2	HRT	5	Ctrl	10mx10m	>2m	0	0	0	0	0	0	0	0
CB3	HRT	5	Ctrl	10mx10m	>2m	0	0	0	0	0	0	0	0
CB1	HRT	5	E	10mx10m	>2m	0	0	0	0	0	0	0	0
CB4	HRT	5	E	10mx10m	>2m	0	0	0	0	0	0	0	0
CA2	HRT	6	G	10mx10m	>2m	0	0	0	0	0	0	0	0
CA3	HRT	6	G	10mx10m	>2m	0	0	0	0	0	0	0	1
CA1	HRT	6	EG	10mx10m	>2m	27	0	32	0	12	11	4	1
CA4	HRT	6	EG	10mx10m	>2m	14	0	21	2	5	4	0	1
